# Supplementary material
Source: PubMed Central journal article supplement (PMC4134440)
Supplement: NIHMS587147-supplement-ESI.pdf [file NIHMS587147-supplement-ESI.pdf]

## Supplementary Data

**Supplementary Table:** List of total miRNAs found upregulated or downregulated in pancreatic cancer patients in comparison to healthy individuals as determined by miRNA expression profile analysis on ExoChip bound exosomes.

| CASE # 1                             |                                         | CASE # 2                             |                                         |
|--------------------------------------|-----------------------------------------|--------------------------------------|-----------------------------------------|
| Upregulated miRNA (Fold change >1.5) | Downregulated miRNA (Fold change ≤0.67) | Upregulated miRNA (Fold change >1.5) | Downregulated miRNA (Fold change ≤0.67) |
| hsa-miR-1208                         | hsa-miR-10b*                            | hsa-miR-130a                         | hsa-miR-601                             |
| hsa-miR -1225-3P                     | hsa-miR-601                             | hsa-miR -1274B                       | hsa-miR-106b                            |
| hsa-miR -1290                        | hsa-miR-106b                            | hsa-miR-548a                         | hsa-miR-29c                             |
| hsa-miR-130a                         | hsa-miR-92a                             | hsa-miR -1208                        | hsa-miR-520c-3p                         |
| hsa-miR-147                          | hsa-miR-181c                            | hsa-miR-509-5p                       | hsa-miR -320B                           |
| hsa-miR-150                          | hsa-miR-328                             | hsa-miR-191                          | hsa-miR-92a                             |
| hsa-miR-151-3p                       | mmu-miR-374-5p                          | hsa-miR-520f                         | hsa-miR -1275                           |
| hsa-miR-184                          | hsa-miR-190b                            | mmu-miR-374-5p                       | hsa-miR-302c*                           |
| hsa-miR-191                          | hsa-miR-551b*                           | hsa-miR-29b                          | hsa-miR-205                             |
| hsa-miR-192                          | hsa-miR-202                             | hsa-miR-636                          | hsa-miR-222                             |
| hsa-miR-194                          | hsa-miR-367                             | hsa-miR-190b                         | hsa-miR-192                             |
| hsa-miR-203                          | hsa-miR-302a                            | hsa-miR-30b                          | hsa-miR-409-3p                          |
| hsa-miR-20a                          | hsa-miR-648                             | hsa-miR-597                          | hsa-miR-197                             |
| hsa-miR-212                          | hsa-miR -1260                           | hsa-miR-302d                         | hsa-miR-328                             |
| hsa-miR-215                          | hsa-miR-432*                            | hsa-miR-520e                         | hsa-miR -1290                           |
| hsa-miR-222                          | hsa-miR -1275                           | hsa-miR-331-5p                       | hsa-miR-135b*                           |
| hsa-miR-29b                          | hsa-miR -720                            | hsa-miR-548c                         | hsa-miR-376a                            |
| hsa-miR-29c                          | hsa-miR-302c*                           | hsa-miR-203                          | hsa-miR-27b                             |
| hsa-miR-302c                         | hsa-miR-573                             | hsa-miR-518d                         | hsa-miR-367                             |
| hsa-miR-302d                         | hsa-miR-625*                            | hsa-miR-150                          | hsa-miR -1260                           |
| hsa-miR-30b                          | hsa-miR-135b*                           | hsa-miR-551b                         | hsa-miR-302a                            |
| hsa-miR-30c                          | hsa-miR -1183                           | hsa-miR-571                          | hsa-miR-648                             |
| hsa-miR-30e-3p                       | hsa-miR-638                             | rno-miR-7*                           | hsa-miR-30c                             |
| hsa-miR-323-3p                       | hsa-miR -1274B                          | hsa-miR-645                          | hsa-miR-580                             |
| hsa-miR-346                          | hsa-miR-208                             | hsa-miR-378                          | hsa-miR-147                             |
| hsa-miR-34a                          |                                         | hsa-miR-646                          | hsa-miR-202                             |
| hsa-miR-34c                          |                                         | hsa-miR-381                          | hsa-miR-624                             |
| hsa-miR-375                          |                                         | hsa-miR-758                          | hsa-miR-99b*                            |
| hsa-miR-381                          |                                         | hsa-miR-302b                         | hsa-miR-659                             |
| hsa-miR-409-3p                       |                                         | hsa-miR-708                          | hsa-miR-208                             |
| hsa-miR-411                          |                                         | hsa-miR-657                          | hsa-miR-181c                            |
| hsa-miR-483-5p                       |                                         |                                      | hsa-miR-302c                            |
| hsa-miR-509-5p                       |                                         |                                      | hsa-miR-410                             |
| hsa-miR-518d                         |                                         |                                      | hsa-miR-661                             |
| hsa-miR-520c-3p                      |                                         |                                      | hsa-miR-184                             |
| hsa-miR-520e                         |                                         |                                      | hsa-miR-211                             |
| hsa-miR-551b                         |                                         |                                      | hsa-miR-324-3p                          |
| hsa-miR-571                          |                                         |                                      | hsa-miR-34c                             |
| hsa-miR-597                          |                                         |                                      | hsa-miR-551b*                           |
| hsa-miR-624                          |                                         |                                      | hsa-miR-212                             |
| hsa-miR-640                          |                                         |                                      | hsa-miR-34a                             |
| hsa-miR-646                          |                                         |                                      | hsa-miR-638                             |
| hsa-miR-657                          |                                         |                                      |                                         |
| hsa-miR-659                          |                                         |                                      |                                         |
| hsa-miR-662                          |                                         |                                      |                                         |
| hsa-miR-708                          |                                         |                                      |                                         |
| hsa-miR-872                          |                                         |                                      |                                         |
| hsa-miR-888                          |                                         |                                      |                                         |

**Figure S1**

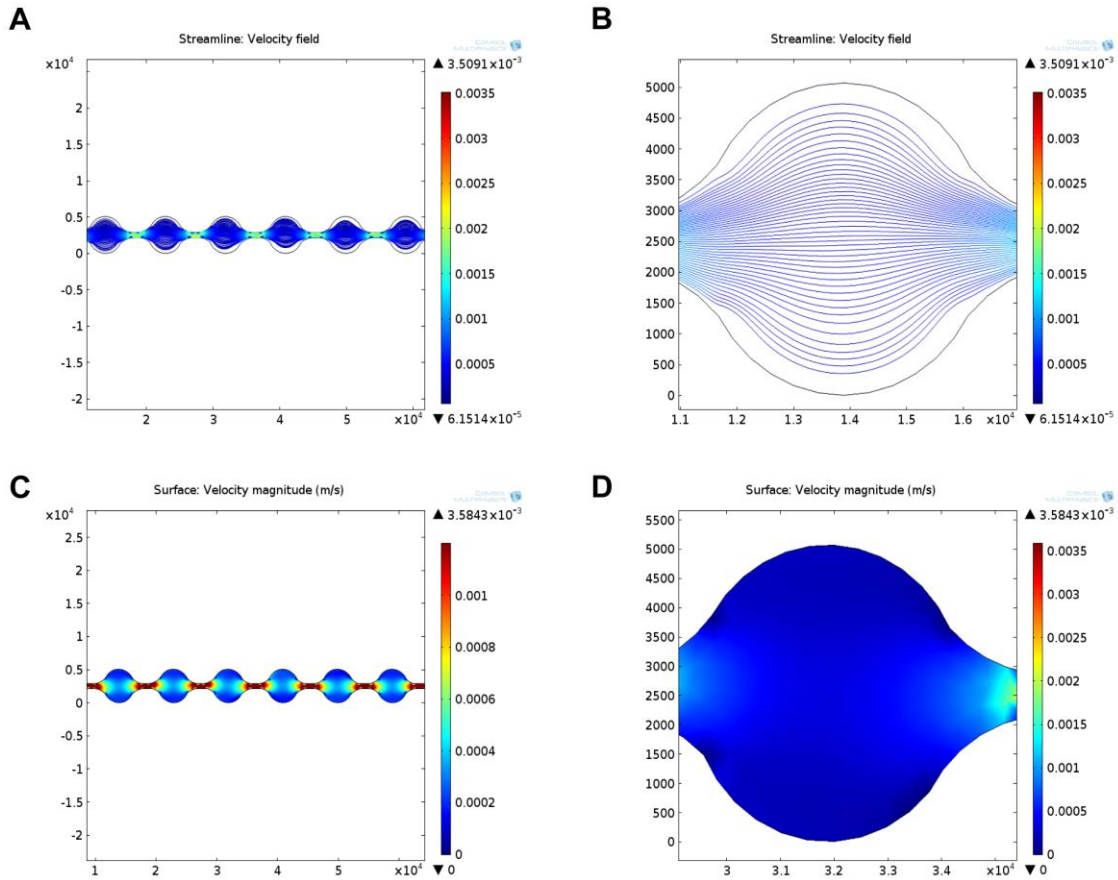

**Fig. S1: Fluid dynamics studies using *Comsol Multiphysics* package.** Fluid flow analysis through the newly designed ExoChip was simulated using COMSOL Multiphysics 4.3 software (COMSOL, Inc., Burlington, MA, USA) to generate velocity profile of the serum infusion. The simulation was done using inlet velocity of 0.001034 m/s (8  $\mu$ l/min) for 100  $\mu$ m channel height, and using blood density and viscosity with symmetry boundary condition and no-slip on the walls. The streamline flow analysis showed an overall consistency in the streamlined laminar flow of the fluid through the ExoChip chambers (Fig S1A,B). Further, the velocity profile showed the low velocity of the fluid in the circular region of the chambers whereas higher velocity was observed in the narrower interconnecting regions of the channels (Fig S1: C,D).

Figure:S2

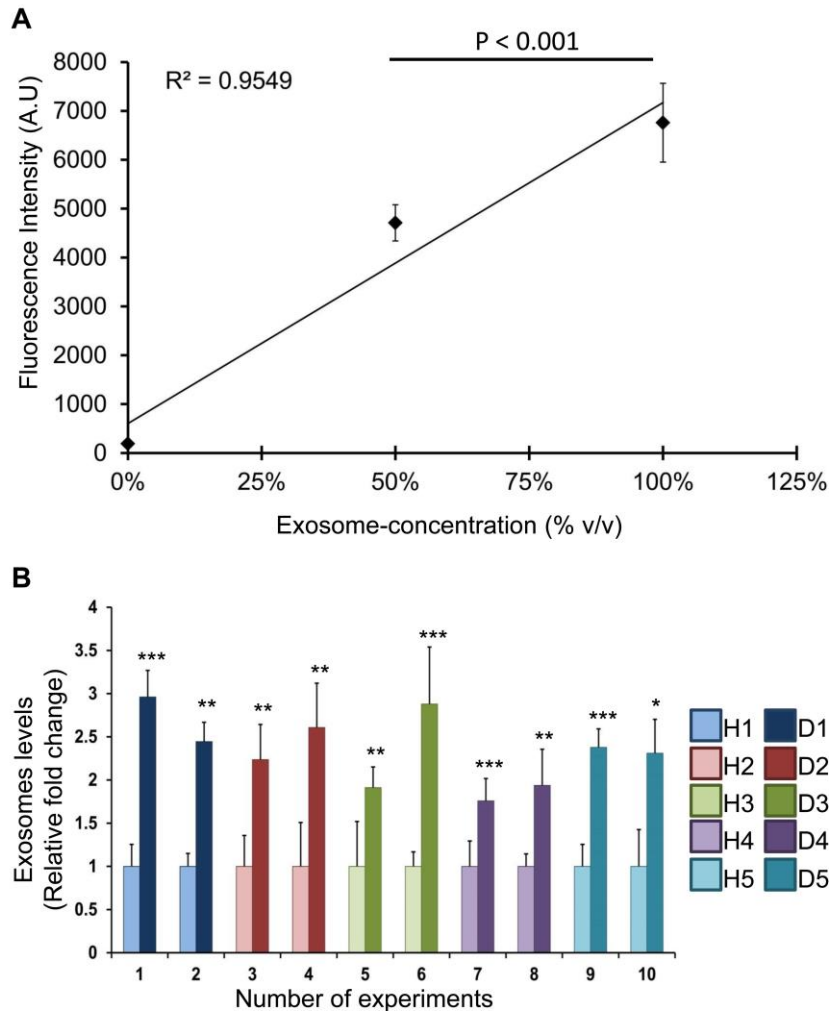

**Fig. S2: A: Experimental validation for quantification of ExoChip immobilized exosomes.**

To determine the sensitivity of capture and quantification of relative abundance of exosomes, a plot of the exosomes amount infused vs fluorescence intensity was generated. Exosome-free serum was prepared from 0.2 $\mu$ m filtered healthy serum using exoquick precipitation solution (SBI System Biosciences) following instructions provided by manufacturer. Samples containing increasing concentration (% volume/volume) of normal healthy serum (exosome-serum) were prepared, namely 0% exosome-serum (exosome-free serum), 50% exosome-serum (1:1, exosome-free serum/exosome-serum) and 100% exosome-serum samples, and infused through

ExoChip. Immobilized exosomes were stained with DiO and fluorescence intensity recorded as described in material and methods section. Plot shows a linear trend of exosome capture with increasing exosome concentration in the serum with *R-square* very close to 1. **B: Relative abundance of Exosome in clinical samples.** Relative fold change in exosomes levels calculated for experiments performed in duplicates, analyzing serum obtained from pancreatic cancer patients (n=5) and healthy individuals (n=5) using ExoChip. Means of the duplicate experiments for each sample is shown in Fig. 4B. \*\*\*P<0.001, \*\*P<0.01
